# Supplementary material for: Resistance of Superhydrophobic Surface-Functionalized TiO2 Nanotubes to Corrosion and Intense Cavitation
Source: MDPI journal article supplement (doi:10.3390/nano8100783), 2018-10-02
Supplement: s1 [file s1]

## **Supplementary Information**

### **Resistance of Superhydrophobic Surface-Functionalized TiO<sub>2</sub> Nanotubes to Corrosion and Intense Cavitation**

Weidi Hua<sup>1†</sup>, Piyush Kar<sup>1†</sup>, Partha Roy<sup>2</sup>, Lintong Bu,<sup>1</sup> Lian C.T. Shoute,<sup>1</sup> Pawan Kumar<sup>1</sup> and Karthik Shankar<sup>\*1</sup>

<sup>1</sup>*Department of Electrical and Computer Engineering, University of Alberta, 9211-116 St, Edmonton, Alberta T6G 1H9, Canada*

<sup>2</sup>*Department of Chemistry, Central University of Rajasthan, NH-8, Bandar Sindri, Rajasthan 305817, India*

†Authors who contributed equally.

\*Email: [kshankar@ualberta.ca](mailto:kshankar@ualberta.ca)

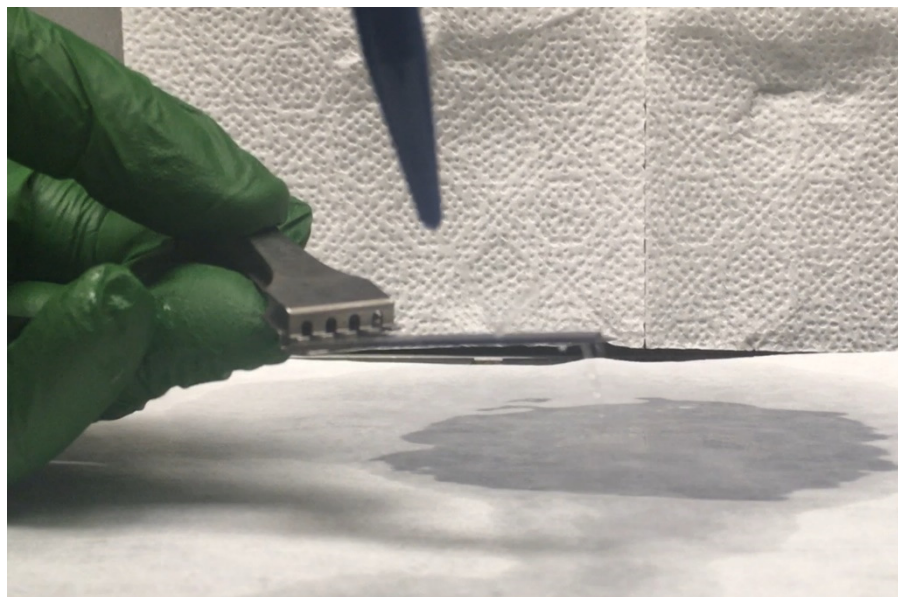

**Figure S1.** The water repelling tendency of the ODPF functionalized TNAs surface before ultrasonic wave treatment.

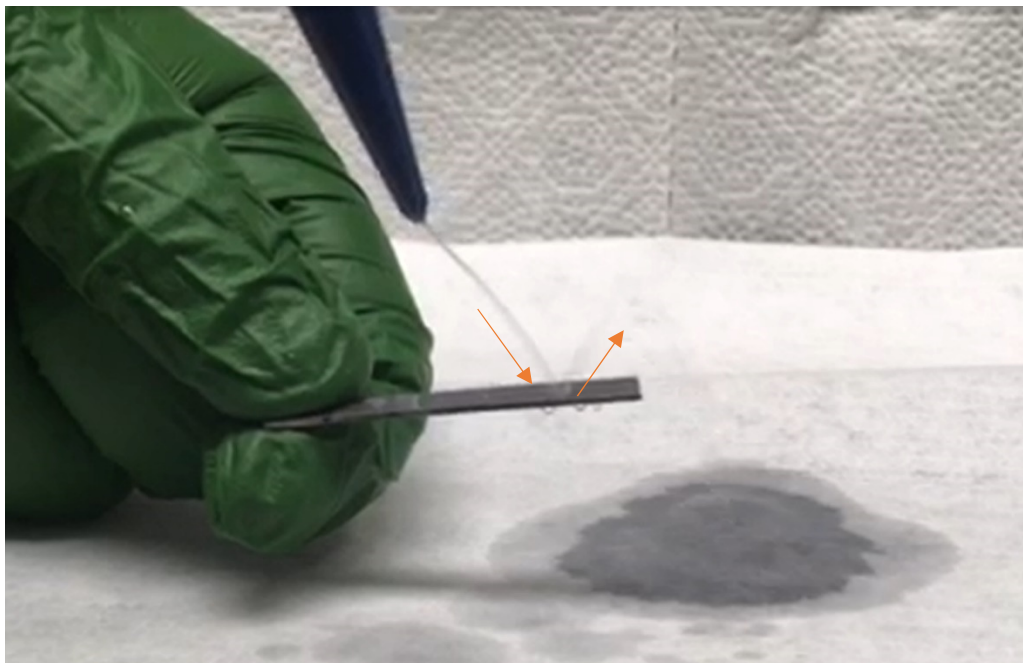

**Figure S2.** Resilience of the superhydrophobic character of an ODPA coated TNTA surface following long time exposure to ambient environment after ultrasonic treatment.

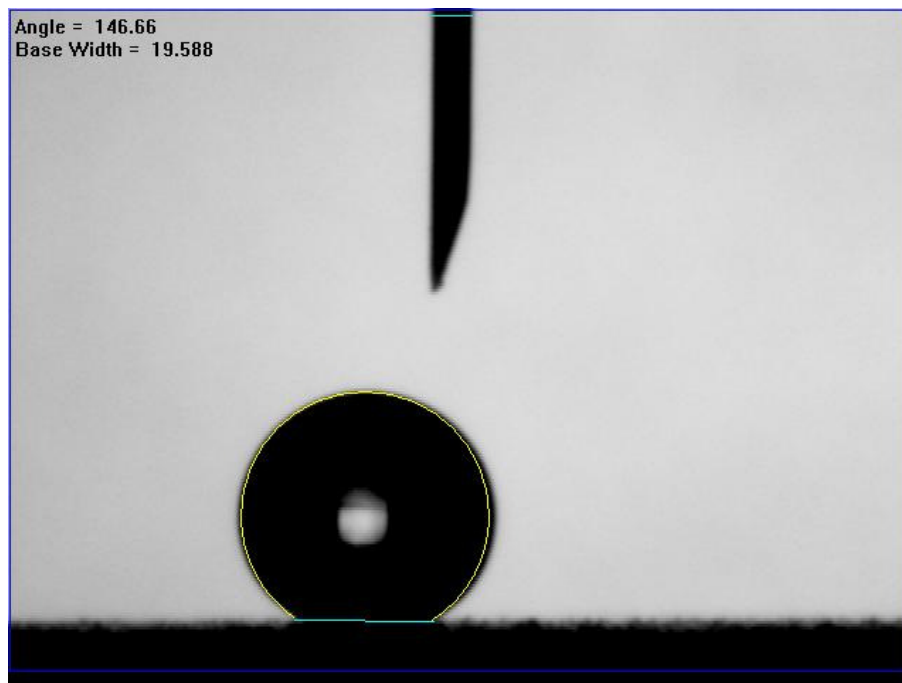

(a)

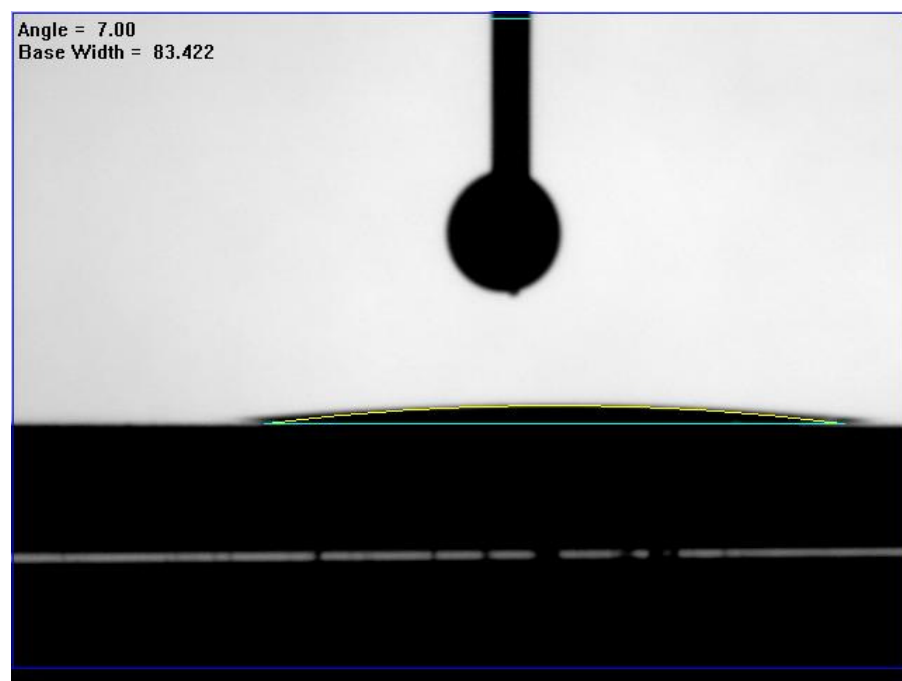

(b)

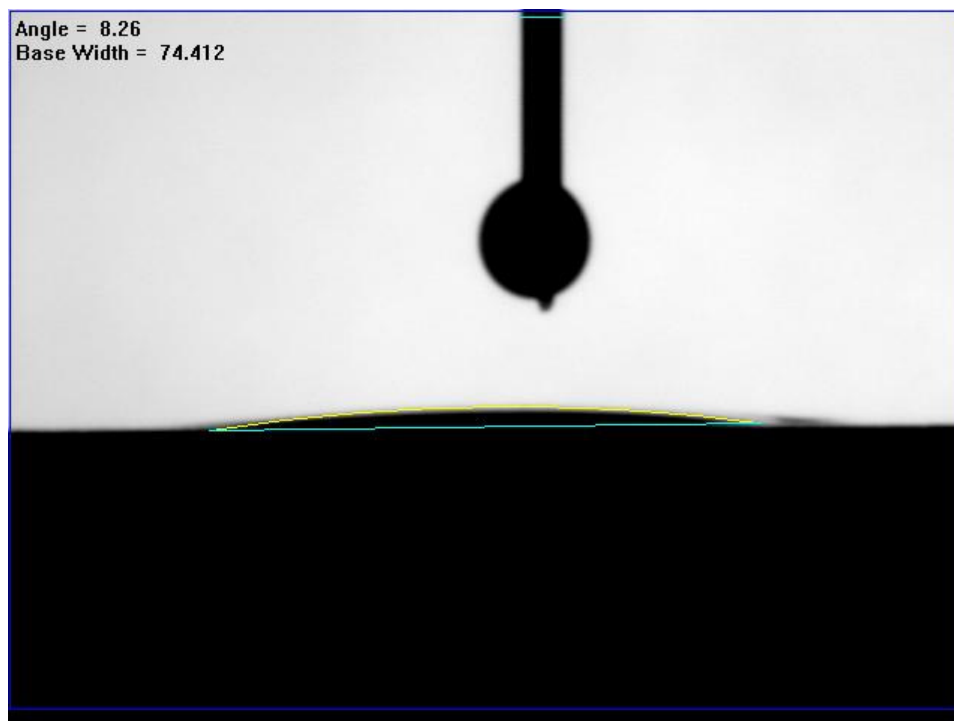

(c)

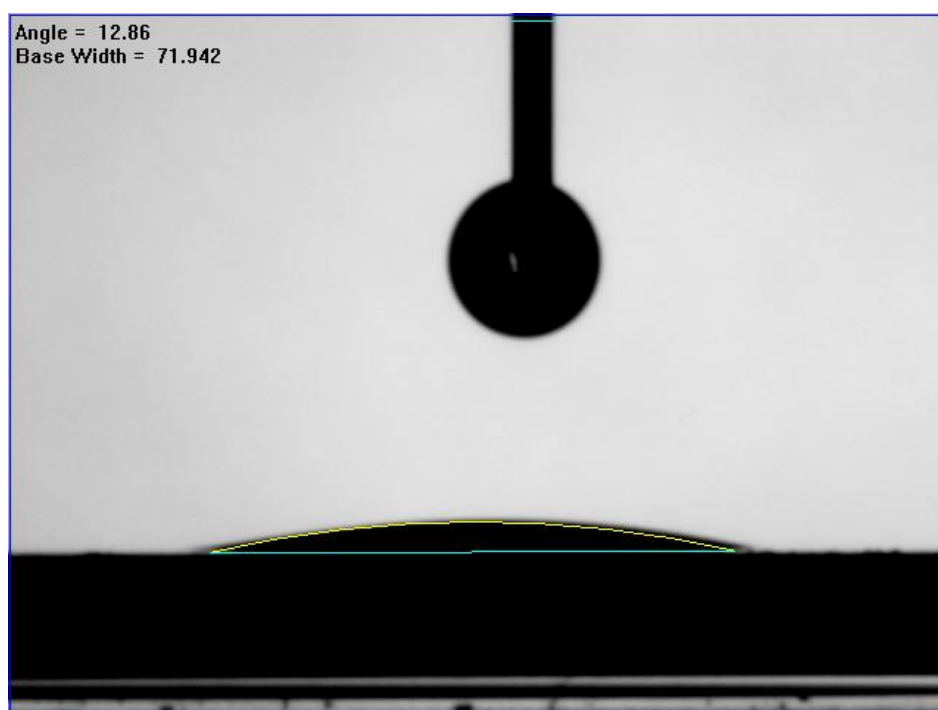

(d)

**Figure S3.** (a) Contact angles of commercial coating incorporated TiO<sub>2</sub> nanotube arrays. (a) Before ultrasonication; (b) and (c) After ultrasonication in water for 10 and 60 minutes, respectively. (d) After ultrasonication in methanol for 10 minutes.

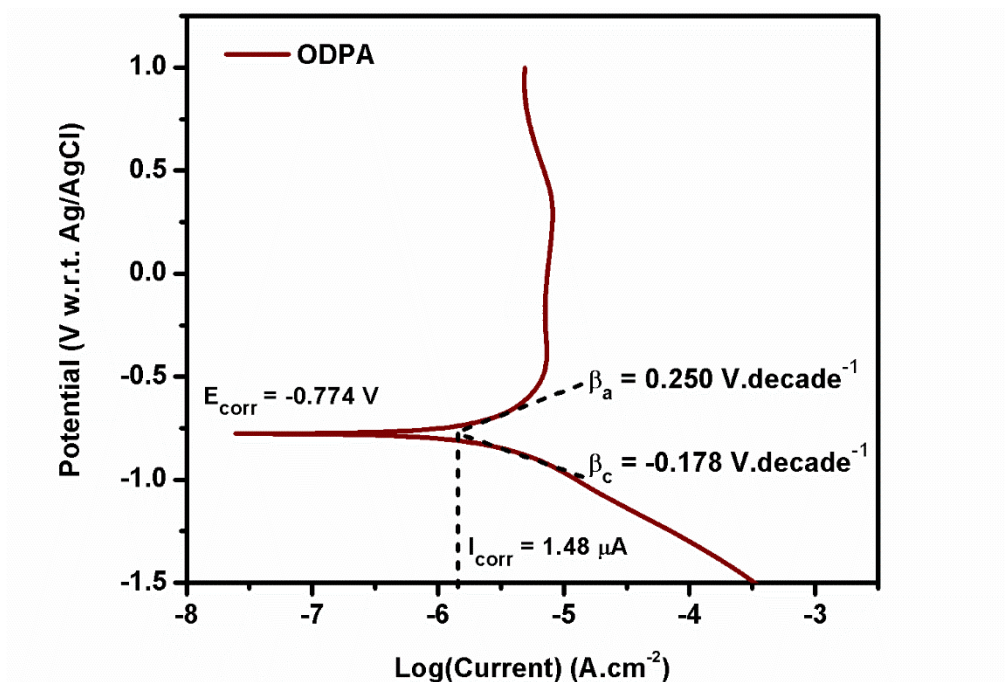

(a)

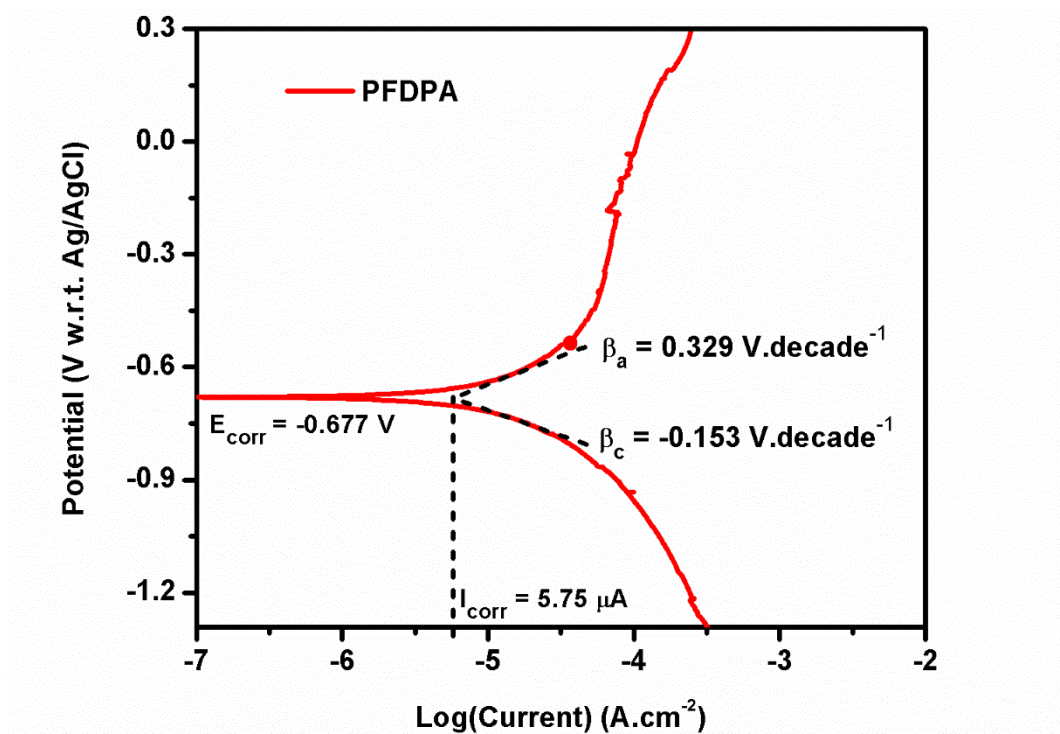

(b)

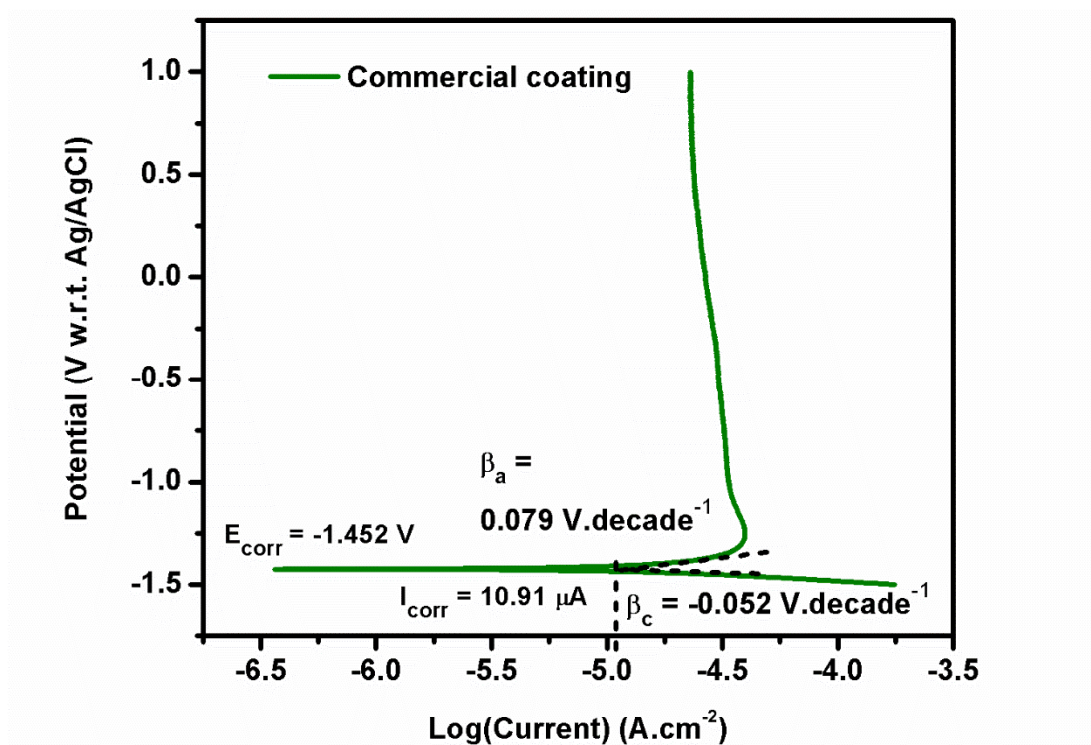

(c)

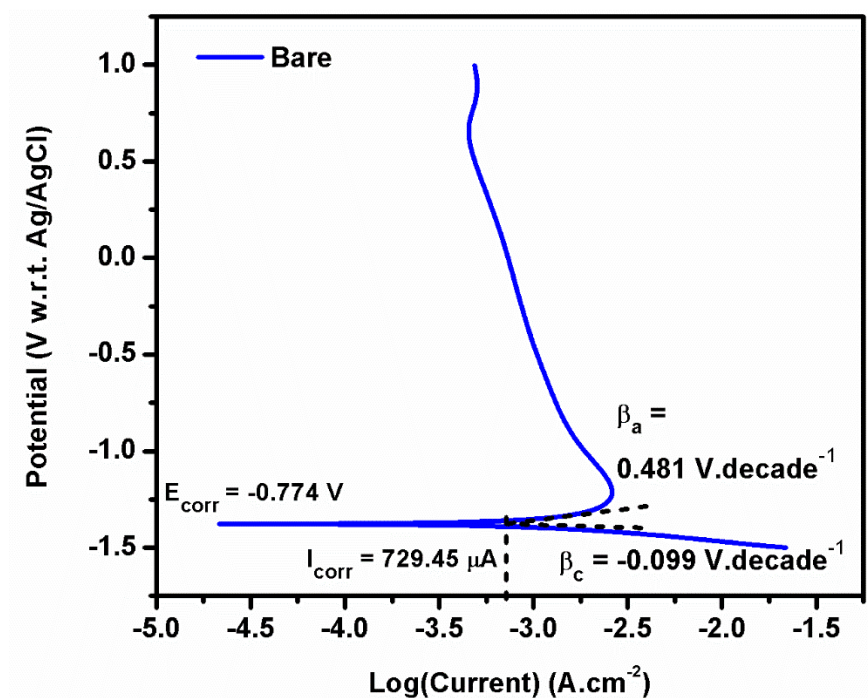

(d)

**Figure S4.** Tafel plots showing the values Tafel constants,  $E_{\text{corr}}$  and  $I_{\text{corr}}$  for (a) ODPA SAM (b) PFDPA SAM (c) commercial coating and (d) bare  $\text{TiO}_2$  nanotubes.

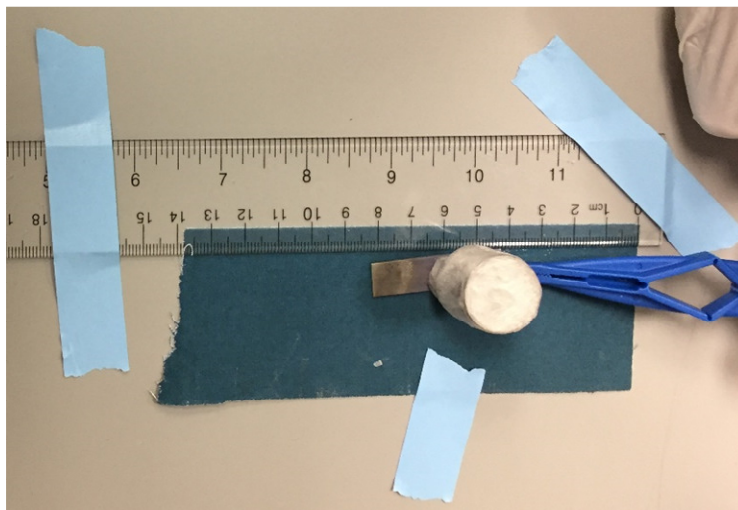

**Figure S5.** Photograph of abrasion test in process. A 50 gram weight is placed on the SAM-coated TNTA sample and then the sample is pushed across a 320-grit sand paper for a distance of 5 cm using a pair of (blue colored) tweezers.
