# Supplementary material for: Resistance of Superhydrophobic Surface-Functionalized TiO2 Nanotubes to Corrosion and Intense Cavitation
Source: Nanomaterials (Basel). 2018 Oct 2;8(10):783. doi: 10.3390/nano8100783 (PMC6215275; doi:10.3390/nano8100783)
Supplement: Supplementary file 1 [file nanomaterials-08-00783-s001.zip]

Archive with 6 entries (6 files):
- ODPA-coated TNTA_advancing contact angle measurement video.avi
- ODPA-coated TNTA_receding contact angle measurement video.avi
- PFDPA-coated TNTA_advancing contact angle measurement video.avi
- PFDPA-coated TNTA_receding contact angle measurement video.avi
- Revised ESI_Nanomaterials.pdf
- SAM-coated TNTA Abrasion Test_Video.MOV
